# Supplementary material for: Design of D–A–π–A organic dyes with different acceptor and auxiliary acceptor for highly efficient dye-sensitized solar cells: a computational study
Source: Royal Society of Chemistry journal article supplement (doi:10.1039/c4ra06324d), 2014-10-02
Supplement: c4ra06324d1.pdf [file c4ra06324d1.pdf]

Supporting Information

Table S1. Electronic transition data in terms of band wavelength ( $\lambda$ /nm), oscillator strength ( $f$ ), and electronic configurations obtained by CAM-B3LYP/6-31G(d) level for each molecule in THF.

| Dyes | $\lambda$ /nm | $E$ /eV | $f$    | Main configuration                                                                              |
|------|---------------|---------|--------|-------------------------------------------------------------------------------------------------|
| TSA1 | 496           | 2.50    | 1.9997 | H-1->LUMO (37%), HOMO->LUMO (50%)                                                               |
|      | 337           | 3.68    | 0.3080 | H-1->L+1 (15%), HOMO->LUMO (28%), HOMO->L+1 (41%)                                               |
|      | 304           | 4.08    | 0.1884 | H-4->LUMO (13%), H-2->LUMO (30%), H-1->L+1 (19%), HOMO->L+2 (14%)                               |
| TSA2 | 428           | 2.90    | 2.1520 | H-1->LUMO (30%), HOMO->LUMO (58%)                                                               |
|      | 283           | 4.38    | 0.3277 | H-2->LUMO (22%), H-1->L+1 (15%), HOMO->L+2 (27%)                                                |
| TSA3 | 503           | 2.47    | 2.1583 | H-1->LUMO (40%), HOMO->LUMO (44%)                                                               |
|      | 381           | 3.25    | 0.2222 | H-2->LUMO (19%), H-1->LUMO (29%), HOMO->LUMO (14%), HOMO->L+1 (25%)                             |
|      | 345           | 3.59    | 0.2752 | H-1->L+1 (16%), HOMO->LUMO (36%), HOMO->L+1 (29%)                                               |
|      | 319           | 3.89    | 0.1835 | H-4->LUMO (15%), H-2->LUMO (32%), H-1->L+1 (18%), HOMO->L+2 (11%)                               |
| TSA4 | 504           | 2.46    | 2.4025 | H-1->LUMO (38%), HOMO->LUMO (44%)                                                               |
|      | 348           | 3.56    | 0.2702 | H-1->L+1 (16%), HOMO->LUMO (39%), HOMO->L+1 (25%)                                               |
|      | 319           | 3.89    | 0.4387 | H-4->LUMO (16%), H-2->LUMO (29%), H-1->L+1 (19%), HOMO->L+2 (11%)                               |
| TBA1 | 517           | 2.40    | 1.8388 | H-1->LUMO (31%), HOMO->LUMO (52%), HOMO->L+1 (10%)                                              |
|      | 415           | 2.99    | 0.1621 | H-1->LUMO (36%), HOMO->L+1 (37%)                                                                |
|      | 297           | 4.18    | 0.2157 | H-2->LUMO (20%), HOMO->L+2 (19%), HOMO->L+3 (16%), H-1->L+1 (9%)                                |
| TBA2 | 488           | 2.54    | 1.3816 | H-1->LUMO (20%), HOMO->LUMO (71%)                                                               |
|      | 379           | 3.27    | 0.2597 | H-1->LUMO (57%), HOMO->LUMO (15%), HOMO->L+1 (10%)                                              |
|      | 348           | 3.56    | 0.4485 | H-1->LUMO (14%), H-1->L+1 (42%), HOMO->L+1 (25%)                                                |
|      | 294           | 4.22    | 0.1981 | H-2->LUMO (15%), HOMO->L+1 (10%), HOMO->L+2 (29%), HOMO->L+3 (16%)                              |
| TBA3 | 522           | 2.38    | 2.0998 | H-1->LUMO (33%), HOMO->LUMO (47%), HOMO->L+1 (11%)                                              |
|      | 428           | 2.90    | 0.1121 | H-2->LUMO (10%), H-1->LUMO (32%), HOMO->L+1 (41%)                                               |
|      | 338           | 3.67    | 0.1493 | H-2->LUMO (24%), H-1->L+1 (21%), HOMO->L+1 (25%)                                                |
|      | 310           | 4.00    | 0.2027 | H-1->L+2 (23%), HOMO->L+2 (15%), H-1->L+1 (8%), HOMO->LUMO (9%), HOMO->L+1 (8%), HOMO->L+3 (7%) |
|      | 289           | 4.29    | 0.4715 | H-8->LUMO (10%), HOMO->L+3 (17%), HOMO->L+4 (22%)                                               |
| TBA4 | 520           | 2.38    | 2.116  | H-1->LUMO (33%), HOMO->LUMO (44%), HOMO->L+1 (14%)                                              |
|      | 427           | 2.90    | 0.3296 | H-2->LUMO (11%), H-1->LUMO (32%), HOMO->L+1 (41%)                                               |
|      | 312           | 3.97    | 0.1685 | H-1->L+2 (25%), HOMO->L+2 (16%), HOMO->LUMO (7%), HOMO->L+1 (8%), HOMO->L+3 (8%)                |
|      | 289           | 4.29    | 0.3830 | HOMO->L+3 (14%), HOMO->L+5 (26%), H-2->L+1 (8%), HOMO->L+6 (8%)                                 |
|      | 283           | 4.38    | 0.2614 | H-10->L+1 (17%), H-9->LUMO (17%), H-9->L+1 (10%), H-4->LUMO (10%), H-4->LUMO (7%)               |

|      |     |      |        |                                                                     |
|------|-----|------|--------|---------------------------------------------------------------------|
| TDA1 | 588 | 2.11 | 1.9805 | H-1->LUMO (11%), HOMO->LUMO (76%)                                   |
|      | 356 | 3.48 | 0.5915 | H-2->LUMO (63%), HOMO->L+1 (12%)                                    |
| TDA2 | 547 | 2.27 | 1.8376 | HOMO->LUMO (87%)                                                    |
|      | 349 | 3.55 | 0.4823 | H-2->LUMO (29%), H-1->LUMO (21%), H-1->L+1 (18%), HOMO->L+1 (21%)   |
|      | 332 | 3.73 | 0.2053 | H-2->LUMO (42%), HOMO->L+1 (35%)                                    |
|      | 290 | 4.28 | 0.1466 | H-2->L+1 (14%), HOMO->L+2 (44%)                                     |
| TDA3 | 586 | 2.12 | 2.1488 | HOMO->LUMO (75%), HOMO->L+1 (11%)                                   |
|      | 425 | 2.92 | 0.2073 | H-2->LUMO (27%), H-1->LUMO (22%), HOMO->L+1 (41%)                   |
|      | 361 | 3.43 | 0.5813 | H-2->LUMO (48%), H-1->LUMO (12%), H-1->L+1 (12%), HOMO->L+1 (8%)    |
| TDA4 | 588 | 2.11 | 2.3235 | H-1->LUMO (10%), HOMO->LUMO (71%), HOMO->L+1 (13%)                  |
|      | 425 | 2.92 | 0.1413 | H-2->LUMO (26%), H-1->LUMO (19%), HOMO->L+1 (42%)                   |
|      | 363 | 3.42 | 0.6195 | H-2->LUMO (51%), HOMO->L+1 (11%)                                    |
|      | 299 | 4.15 | 0.1843 | H-5->LUMO (25%), H-2->L+1 (11%), H-1->LUMO (12%), H-1->L+1 (12%)    |
| TNA1 | 492 | 2.52 | 2.1372 | H-1->LUMO (41%), HOMO->LUMO (45%)                                   |
|      | 343 | 3.62 | 0.1683 | H-1->L+1 (22%), HOMO->LUMO (32%), HOMO->L+1 (33%)                   |
|      | 310 | 4.00 | 0.2018 | H-4->LUMO (12%), H-2->LUMO (32%), H-1->L+1 (22%), HOMO->L+1 (10%)   |
| TNA2 | 436 | 2.84 | 2.1493 | H-1->LUMO (30%), HOMO->LUMO (60%)                                   |
|      | 283 | 4.38 | 0.2339 | H-2->LUMO (32%), HOMO->L+1 (19%), HOMO->L+4 (10%)                   |
| TNA3 | 501 | 2.48 | 2.3392 | H-1->LUMO (44%), HOMO->LUMO (40%)                                   |
|      | 349 | 3.55 | 0.1435 | H-1->L+1 (22%), HOMO->LUMO (39%), HOMO->L+1 (23%)                   |
|      | 324 | 3.83 | 0.3233 | H-4->LUMO (13%), H-2->LUMO (34%), H-1->L+1 (20%), HOMO->L+1 (10%)   |
| TNA4 | 501 | 2.48 | 2.4557 | H-1->LUMO (42%), HOMO->LUMO (39%)                                   |
|      | 391 | 3.17 | 0.1748 | H-2->LUMO (16%), H-1->LUMO (26%), HOMO->LUMO (11%), HOMO->L+1 (35%) |
|      | 352 | 3.52 | 0.1634 | H-1->L+1 (21%), HOMO->LUMO (42%), HOMO->L+1 (21%)                   |
|      | 325 | 3.82 | 0.2102 | H-4->LUMO (14%), H-2->LUMO (30%), H-1->L+1 (23%)                    |
| TQA1 | 470 | 2.64 | 1.9656 | H-1->LUMO (54%), HOMO->LUMO (32%)                                   |
|      | 312 | 3.97 | 0.1134 | H-1->L+1 (40%), HOMO->L+1 (22%)                                     |
|      | 293 | 4.23 | 0.1916 | H-3->LUMO (10%), H-1->L+2 (11%), HOMO->L+2 (16%), HOMO->L+4 (22%)   |
|      | 285 | 4.35 | 0.2276 | H-3->LUMO (21%), H-1->L+1 (12%), HOMO->L+2 (12%), HOMO->L+4 (16%)   |
| TQA2 | 426 | 2.91 | 1.6827 | H-1->LUMO (35%), HOMO->LUMO (54%)                                   |
|      | 358 | 3.46 | 0.2065 | H-1->LUMO (38%), H-1->L+1 (12%), HOMO->LUMO (19%), HOMO->L+1 (18%)  |
|      | 323 | 3.84 | 0.1532 | H-1->LUMO (17%), H-1->L+1 (37%), HOMO->LUMO (10%), HOMO->L+1 (10%)  |
|      | 285 | 4.35 | 0.2539 | HOMO->L+2 (32%), HOMO->L+5 (27%)                                    |
| TQA3 | 481 | 2.58 | 2.1728 | H-1->LUMO (59%), HOMO->LUMO (26%)                                   |
|      | 326 | 3.80 | 0.2160 | H-4->LUMO (12%), H-2->LUMO (20%), H-1->L+1 (28%), HOMO->L+1         |

---

|      |     |      |                                                           |
|------|-----|------|-----------------------------------------------------------|
|      |     |      | (19%)                                                     |
|      | 295 | 4.20 | 0.1502 H-2->LUMO (17%), H-1->L+2 (19%), HOMO->L+2 (12%)   |
|      | 282 | 4.40 | 0.3765 H-1->L+2 (16%), HOMO->L+3 (16%), HOMO->L+5 (16%)   |
| TQA4 | 480 | 2.58 | 2.2924 H-1->LUMO (56%), HOMO->LUMO (26%)                  |
|      | 396 | 3.13 | 0.1678 H-1->LUMO (20%), HOMO->LUMO (12%), HOMO->L+1 (45%) |
|      | 305 | 4.07 | 0.1404 H-2->LUMO (10%), H-1->L+1 (15%), H-1->L+2 (20%)    |
|      | 295 | 4.20 | 0.1920 H-2->LUMO (22%), H-1->L+2 (11%), HOMO->L+2 (10%)   |
|      | 282 | 4.40 | 0.3286 H-1->L+2 (15%), HOMO->L+3 (13%), HOMO->L+6 (32%)   |

---
